# Supplementary material
Source: PubMed Central journal article supplement (PMC5016181)
Supplement: supp_M116.735720_Supplemental_Figure_1_and_Supplemental_Tables_1-4.pdf [file supp_M116.735720_Supplemental_Figure_1_and_Supplemental_Tables_1-4.pdf]

**Structural elements in the G $\alpha$ s and G $\alpha$ q C-termini that mediate selective GPCR signaling**

Ansley Semack\*, Manbir Sandhu\*, Rabia U. Malik, Nagarajan Vaidehi, Sivaraj Sivaramakrishnan

**Supplemental Figure 1.** RMSF of  $\beta$ 2-AR and V<sub>1A</sub>R with s, i, and q peptides. RMSF analysis of total 100 ns ensemble from each receptor-peptide complex. Average structure for RMSF fitting identified by least-squares fit of entire ensemble. The average RMSF (y-axis) is plotted for each residue in the receptor (x-axis). Extracellular and intracellular loops are denoted with grey shading to distinguish RMSF from transmembrane/helix and loop regions of the receptor. RMSF plots are colored according to the peptide bound: s (red), i (green), q (blue). (a) RMSF of  $\beta$ 2-AR with s, i, and q peptides. (b) RMSF of V<sub>1A</sub>R with s, i, and q peptides.

a. RMSF of  $\beta$ 2-AR with s, i, q peptides

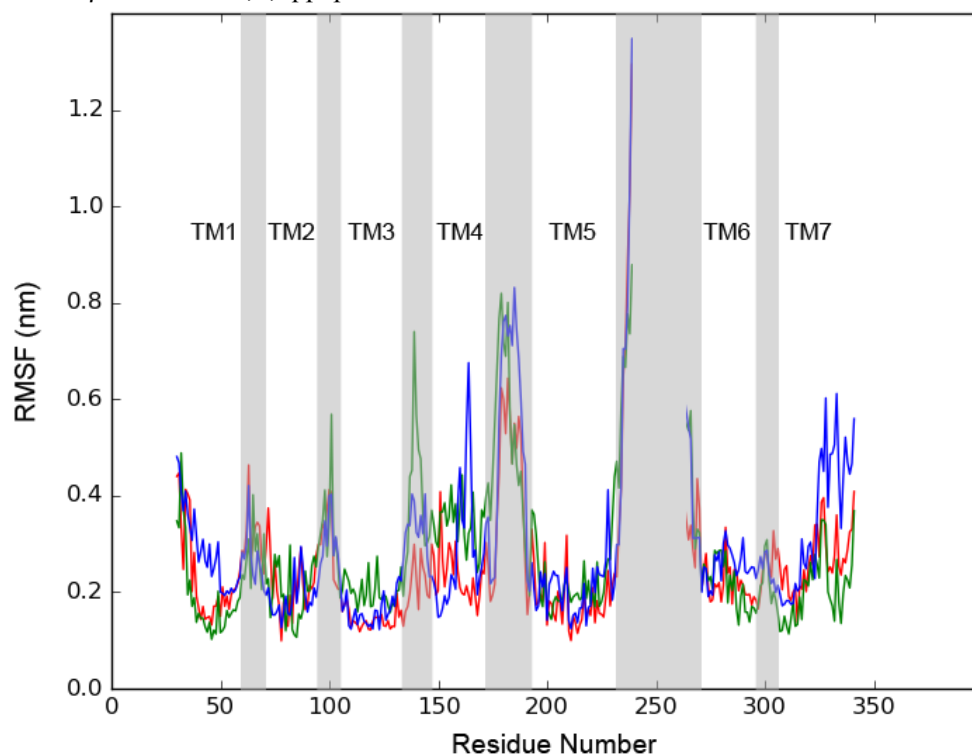

Supplemental Figures and Tables

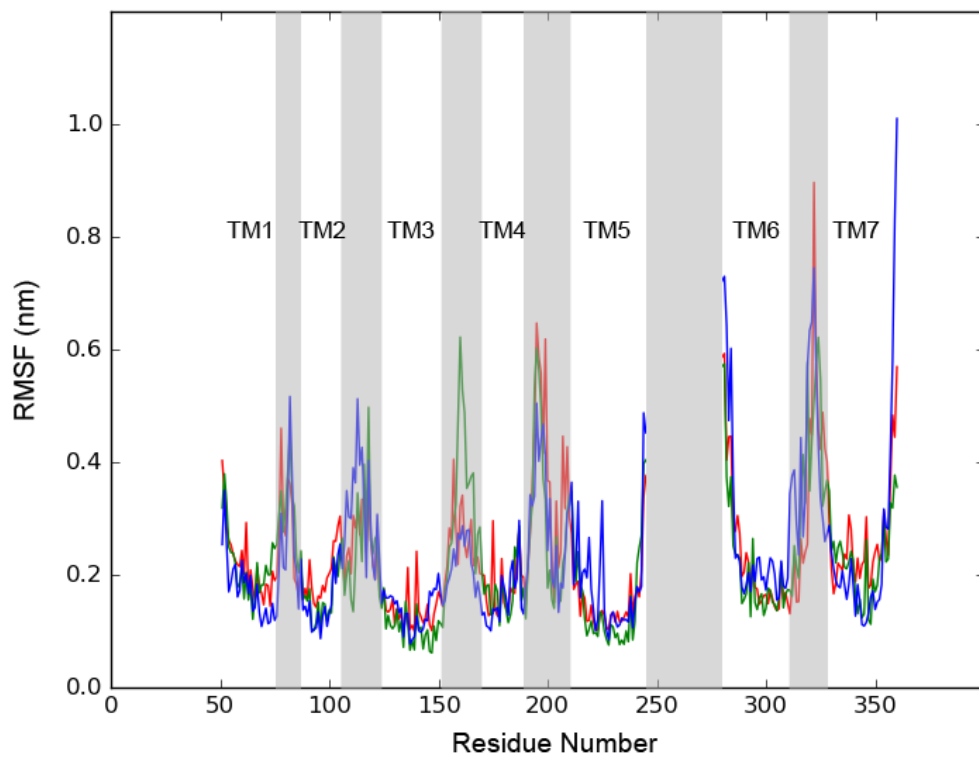

*b.* RMSF of V<sub>1A</sub>R with s, i, q peptides

## Supplemental Figures and Tables

**Supplemental Table 1.** *Analysis of variance (ANOVA) of  $\Delta$ FRET for each receptor-peptide pair compared per receptor.* Statistical analysis of  $\Delta$ FRET values from Figure 1 including the F values and significant  $p$  values of all receptor-peptide pairings compared per receptor.

| Receptor                  | F (DFn, DFd)       | $p$      |
|---------------------------|--------------------|----------|
| $\beta$ 3-AR              | F (3, 64) = 24.02  | < 0.0001 |
| D <sub>1</sub> R          | F (3, 118) = 22.67 | < 0.0001 |
| $\alpha$ <sub>2</sub> -AR | F (3, 111) = 83.25 | < 0.0001 |
| CB <sub>1</sub>           | F (3, 63) = 101.6  | < 0.0001 |
| $\alpha$ <sub>1</sub> -AR | F (3, 69) = 8.852  | < 0.0001 |
| V <sub>1A</sub> R         | F (3, 78) = 58.95  | < 0.0001 |

Supplemental Figures and Tables

**Supplemental Table 2.** *Tukey's Multiple Comparison Test.* Pairwise statistical analysis of  $\Delta$ FRET values from Figure 1 comparing all means of peptides tested per receptor. Mean difference is the difference between the means of the tested peptide comparison. A significant difference between the tested peptides are represented with the following legend: \*,  $p \leq 0.05$ ; \*\*,  $p \leq 0.01$ ; \*\*\*,  $p \leq 0.001$ ; \*\*\*\*,  $p \leq 0.0001$ .

| Receptor                  | Peptide comparison | Mean Difference | S.E. of Difference | Sig. |
|---------------------------|--------------------|-----------------|--------------------|------|
| $\beta$ 3-AR              | NP vs. s           | -0.02467        | 0.003208           | **** |
|                           | NP vs. i           | -0.009918       | 0.003563           | *    |
|                           | NP vs. q           | -0.001885       | 0.003799           | ns   |
|                           | s vs. i            | 0.01475         | 0.003383           | ***  |
|                           | s vs. q            | 0.02278         | 0.00363            | **** |
|                           | i vs. q            | 0.008032        | 0.003948           | ns   |
| D <sub>1</sub> R          | NP vs. s           | -0.01881        | 0.002723           | **** |
|                           | NP vs. i           | -0.006621       | 0.0031             | ns   |
|                           | NP vs. q           | 0.001141        | 0.003472           | ns   |
|                           | s vs. i            | 0.01219         | 0.002755           | ***  |
|                           | s vs. q            | 0.01995         | 0.003168           | **** |
|                           | i vs. q            | 0.007762        | 0.003498           | ns   |
| $\alpha$ <sub>2</sub> -AR | NP vs. s           | -0.002332       | 0.003516           | ns   |
|                           | NP vs. i           | -0.03187        | 0.00308            | **** |
|                           | NP vs. q           | 0.0006149       | 0.003581           | ns   |
|                           | s vs. i            | -0.02953        | 0.002624           | **** |
|                           | s vs. q            | 0.002946        | 0.003197           | ns   |
|                           | i vs. q            | 0.03248         | 0.002711           | **** |
| CB <sub>1</sub>           | NP vs. s           | 0.008413        | 0.003084           | *    |
|                           | NP vs. i           | -0.03256        | 0.002812           | **** |
|                           | NP vs. q           | 0.01266         | 0.003026           | ***  |
|                           | s vs. i            | -0.04097        | 0.003016           | **** |
|                           | s vs. q            | 0.004245        | 0.003216           | ns   |
|                           | i vs. q            | 0.04521         | 0.002956           | **** |
| $\alpha$ <sub>1</sub> -AR | NP vs. s           | -0.008844       | 0.004879           | ns   |
|                           | NP vs. i           | -0.01126        | 0.004762           | ns   |
|                           | NP vs. q           | -0.02061        | 0.004346           | **** |
|                           | s vs. i            | -0.002415       | 0.004233           | ns   |
|                           | s vs. q            | -0.01176        | 0.003759           | *    |
|                           | i vs. q            | -0.009348       | 0.003606           | ns   |
| V <sub>1A</sub> R         | NP vs. s           | -0.001396       | 0.004833           | ns   |
|                           | NP vs. i           | -0.004346       | 0.004833           | ns   |
|                           | NP vs. q           | -0.0429         | 0.004029           | **** |
|                           | s vs. i            | -0.002951       | 0.005048           | ns   |
|                           | s vs. q            | -0.04151        | 0.004285           | **** |
|                           | i vs. q            | -0.03856        | 0.004285           | **** |

## Supplemental Figures and Tables

**Supplemental Table 3.** *Measures of central tendency.* Measures of central tendency are provided for distributions of the TM3 to TM6 distance from simulations of each receptor-peptide complex indicated in the table, and shown in Figs. 2, *b*, and 5, *f*. The mean and median distance are given as an indication of the average TM3 to TM6 distance sampled for each complex, and standard deviation (S.D.) is provided to show the overall variance for this distance across difference pairs of receptor-peptide.

| Receptor          | Peptide       | mean    | median  | S.D.   |
|-------------------|---------------|---------|---------|--------|
| $\beta$ 2-AR      | s             | 18.5986 | 18.5377 | 0.6708 |
|                   | i             | 18.9454 | 19.1708 | 1.1618 |
|                   | q             | 17.6702 | 17.6769 | 0.9922 |
|                   | q-L349Q/E355Q | 19.4268 | 19.3480 | 0.8172 |
| V <sub>1A</sub> R | s             | 15.0258 | 15.524  | 1.2769 |
|                   | i             | 18.0478 | 18.245  | 0.7241 |
|                   | q             | 14.8066 | 14.6131 | 0.5479 |

## Supplemental Figures and Tables

**Supplemental Table 4.** *Two-sample Kolmogorov-Smirnov Test.* Statistical analysis which assesses the equality of two distributions, with the null hypothesis that both distributions are the same. Each comparison in the table below shows rejection of the null hypothesis at the 95% confidence level. The test-statistic is a measure of the difference between the cumulative density function (cdf) plotted for each distribution in the comparison. The  $p$ -value indicates the significance of the test result: \*\*\*\*,  $p < 0.0001$ .

| Receptor           | Peptide comparison  | Test statistic | $p$                     | Sig. |
|--------------------|---------------------|----------------|-------------------------|------|
| $\beta$ 2-AR       | s vs. q             | 0.4673         | $9.70 \times 10^{-61}$  | **** |
|                    | s vs. i             | 0.3349         | $2.08 \times 10^{-31}$  | **** |
|                    | q vs. i             | 0.5694         | $5.75 \times 10^{-90}$  | **** |
| V <sub>1A</sub> AR | s vs. q             | 0.4045         | $1.20 \times 10^{-10}$  | **** |
|                    | s vs. i             | 0.9036         | $8.20 \times 10^{-74}$  | **** |
|                    | q vs. i             | 0.9387         | $1.44 \times 10^{-82}$  | **** |
| $\beta$ 2-AR       | s vs. q             | 0.4673         | $9.70 \times 10^{-61}$  | **** |
|                    | s vs. q-L349Q/E355Q | 0.4354         | $8.72 \times 10^{-49}$  | **** |
|                    | q vs. q-L349Q/E355Q | 0.7110         | $1.05 \times 10^{-124}$ | **** |
